# Supplementary material for: The Effect of Freezing Raw Material on the Quality Changes and Safety of Salted Anchovies (Engraulis encrasicolus, Linnaeus, 1758) at Cold Storage Conditions
Source: MDPI journal article supplement (doi:10.3390/app13106200), 2023-05-18
Supplement: s1 [file s1]

**Supplementary Table S1.** The criteria used to determine sensory changes during refrigerated storage of the control and experimental groups of brined and dry-salted anchovies

| Sensory Scoring Scale of the Salted Anchovy                                                                                                                                     |                                                                                    |                                                                                                                                                                                                   |                                      |
|---------------------------------------------------------------------------------------------------------------------------------------------------------------------------------|------------------------------------------------------------------------------------|---------------------------------------------------------------------------------------------------------------------------------------------------------------------------------------------------|--------------------------------------|
| Appearance                                                                                                                                                                      | Odour                                                                              | Texture                                                                                                                                                                                           | Scores                               |
| Outer color is bright, white and pink flesh, no yellowing, skin shrunken in dry salted groups, flesh yellowish                                                                  | Strong and characteristic anchovy odor and intense salt odor in dry-salted samples | Meat is firm and adherent to the backbone, firming of meat in dry salted groups                                                                                                                   | 10-9<br>(Excellent)                  |
| The outer color is bright, the inner color is white and slightly yellowed, the flesh color is yellowish and brownish in dry-salted groups.                                      | Decreased characteristic anchovy odor                                              | Meat is hard and adherent to the backbone, firming and skin shrinkage in dry-salted groups                                                                                                        | 8-7<br>(Good)                        |
| Slight dulling of outer color, light yellowing of flesh with pinkish brown, dry-salted groups are predominantly brownish.                                                       | Weak characteristic anchovy odor, boiled milk or potato odor                       | The meat is slightly soft and easy to separate from the spine, in dry-salted groups the meat is firm and adhered to the spine                                                                     | 6-5<br>(Medium)                      |
| Outer color is dull and pale, flesh color is yellowish brown, browning in dry salted groups                                                                                     | Bitter and rancid odor similar to lactic acid and acetic acid                      | The meat is soft, and the spine separates immediately, with light watering in the dry-salted group, the meat loosens.                                                                             | 4<br>(Limit point for acceptability) |
| Outer color is fuzzy grayish, flesh color is dark yellow and brownish, dark brown color formation along the spine, lightening and clouding due to watering in dry salted groups | Intense bitterness and an ammonia or sulfurous odor                                | The meat is very soft, in the pickled samples, the meat is watered down, melted and dispersed by hand, in the dry-salted group there is melting of the meat and separation from the spine, flimsy | <4<br>(unacceptable)                 |

**Supplementary Table S2.** The results of regression analysis between sensory values and chemical quality parameters (TVB-N, TBA and TMA) for the experimental group stored in a refrigerator

| Sample type | TVB-N- Sensory                          | TBA- Sensory                            | TMA- Sensory                            |
|-------------|-----------------------------------------|-----------------------------------------|-----------------------------------------|
| 10%         | $R^2 = 0.84$<br>$y = -0.0418x + 8.2069$ | $R^2 = 0.68$<br>$y = -0.087x + 0.9953$  | $R^2 = 0.91$<br>$y = -0.9192x + 8.6758$ |
| 15%         | $R^2 = 0.97$<br>$y = -8.4937x + 84.381$ | $R^2 = 0.96$<br>$y = -0.2607x + 2.618$  | $R^2 = 0.91$<br>$y = -0.4564x + 5.0108$ |
| 20%         | $R^2 = 0.99$<br>$y = -5.865x + 63.253$  | $R^2 = 0.94$<br>$y = -0.341x + 3.7032$  | $R^2 = 0.92$<br>$y = -0.5537x + 6.1062$ |
| 25%         | $R^2 = 0.90$<br>$y = -3.1302x + 41.706$ | $R^2 = 0.63$<br>$y = -0.5395x + 7.0326$ | $R^2 = 0.69$<br>$y = -0.4325x + 6.0139$ |
| 30%         | $R^2 = 0.95$<br>$y = -7.7108x + 75.752$ | $R^2 = 0.90$<br>$y = -0.9416x + 9.663$  | $R^2 = 0.90$<br>$y = -0.6605x + 7.5784$ |
| DS          | $R^2 = 0.97$<br>$y = -4.4566x + 47.541$ | $R^2 = 0.93$<br>$y = -1.2847x + 13.031$ | $R^2 = 0.98$<br>$y = -0.6992x + 7.1703$ |

*TVB-N: Total Volatile Base-Nitrogen, TBA: Thiobarbituric acid, TMA: trimethylamine. DS: Dry-salted.*

**Supplementary Table S3.** The results of regression analysis between sensory values and chemical quality parameters (TVB-N, TBA and TMA) for the control group stored in a refrigerator

| Sample type | TVB-N- Sensory                   | TBA- Sensory                     | TMA- Sensory                    |
|-------------|----------------------------------|----------------------------------|---------------------------------|
| 10%         | $R^2=0.90$<br>$y=-5.843x+63.867$ | $R^2=0.99$<br>$y=-0.011x+0.478$  | $R^2=0.95$<br>$y=-0.448x+5.365$ |
| 15%         | $R^2=0.97$<br>$y=-4.411x+50.859$ | $R^2=0.87$<br>$y=-0.201x+2.121$  | $R^2=0.95$<br>$y=-0.869x+9.188$ |
| 20%         | $R^2=0.97$<br>$y=-4.300x+52.635$ | $R^2=0.96$<br>$y=-0.570x+5.705$  | $R^2=0.99$<br>$y=-0.813x+9.157$ |
| 25%         | $R^2=0.92$<br>$y=-4.015x+51.964$ | $R^2=0.92$<br>$y=-0.632x+6.815$  | $R^2=0.83$<br>$y=-0.461x+6.194$ |
| 30%         | $R^2=0.98$<br>$y=-4.370x+53.487$ | $R^2=0.97$<br>$y=-1.013x+10.784$ | $R^2=0.93$<br>$y=-0.661x+7.815$ |
| DS          | $R^2=0.97$<br>$y=-2.803x+38.314$ | $R^2=0.93$<br>$y=-1.019x+11.114$ | $R^2=0.90$<br>$y=-0.486x+5.918$ |

*TVB-N: Total Volatile Base-Nitrogen, TBA: Thiobarbituric acid, TMA: trimethylamine. DS:*

*Dry salted.*

**Supplementary Table S4.** The results of regression analysis among the values of salt %, moisture % and water activity for the control group during storage in a refrigerator ( $4 \pm 1$  °C)

| Sample type | Salt % - $a_w$                    | Salt % -Moisture%                 | Moisture%- $a_w$                 |
|-------------|-----------------------------------|-----------------------------------|----------------------------------|
| 10%         | $R^2=0.99$<br>$y=-2.2408x+171.33$ | $R^2=0.73$<br>$y=-0.0079x+1.0074$ | $R^2=0.70$<br>$y=0.0175x-0.3303$ |
| 15%         | $R^2=0.99$<br>$y=-1.3205x+101.08$ | $R^2=0.99$<br>$y=-0.0076x+1.0031$ | $R^2=0.97$<br>$y=0.0099x+0.243$  |
| 20%         | $R^2=0.99$<br>$y=-1.4079x+107.79$ | $R^2=0.93$<br>$y=-0.0095x+1.0157$ | $R^2=0.92$<br>$y=0.0133x+0.0061$ |
| 25%         | $R^2=0.98$<br>$y=-1.3071x+99.777$ | $R^2=0.93$<br>$y=-0.0095x+1.0076$ | $R^2=0.93$<br>$y=0.0125x+0.0575$ |
| 30%         | $R^2=0.98$<br>$y=-1.1322x+86.393$ | $R^2=0.98$<br>$y=-0.0083x+0.993$  | $R^2=0.99$<br>$y=0.0096x+0.2649$ |
| DS          | $R^2=0.99$<br>$y=-0.8827x+67.579$ | $R^2=0.90$<br>$y=-0.0105x+0.9728$ | $R^2=0.92$<br>$y=0.0094x+0.2547$ |

*C: Control group, FM: Experimental group,  $a_w$ : water activity DS: Dry-salted.*

**Supplementary Table S5.** The results of regression analysis among the values of salt %, moisture % and water activity for the experimental group during storage in a refrigerator ( $4 \pm 1$  °C)

| Sample type | Salt % - $a_w$                          | Salt % - Moisture%                      | Moisture % - $a_w$                      |
|-------------|-----------------------------------------|-----------------------------------------|-----------------------------------------|
| 10%         | $R^2 = 0.96$<br>$y = -0.0068x + 1.0016$ | $R^2 = 0.86$<br>$y = 0.5588x + 75.852$  | $R^2 = 0.78$<br>$y = -0.0103x + 1.7733$ |
| 15%         | $R^2 = 0.96$<br>$y = -0.0092x + 1.0024$ | $R^2 = 0.76$<br>$y = -1.0874x + 76.844$ | $R^2 = 0.86$<br>$y = 0.007x + 0.4522$   |
| 20%         | $R^2 = 0.98$<br>$y = -0.0104x + 1.0031$ | $R^2 = 0.96$<br>$y = -1.1358x + 76.885$ | $R^2 = 0.80$<br>$y = 0.0045x + 0.6013$  |
| 25%         | $R^2 = 0.85$<br>$y = -0.0086x + 0.9913$ | $R^2 = 0.71$<br>$y = -1.0126x + 75$     | $R^2 = 0.82$<br>$y = 0.0033x + 0.664$   |
| 30%         | $R^2 = 0.85$<br>$y = -0.0086x + 0.9913$ | $R^2 = 0.69$<br>$y = -1.0047x + 74.476$ | $R^2 = 0.80$<br>$y = 0.0031x + 0.6735$  |
| DS          | $R^2 = 0.99$<br>$y = -0.0122x + 1.0038$ | $R^2 = 0.97$<br>$y = -1.0106x + 76.721$ | $R^2 = 0.98$<br>$y = 0.0119x + 0.0899$  |

*C: Control group, FM: Experimental group,  $a_w$ : water activity DS: Dry salted.*

**Supplementary Table S6.** The results of statistical analysis for figures 1-3 relate to sensory values, chemical quality parameters (TVB-N, TBA, TMA), pH,  $a_w$ , moisture, salt and WPS

| Appearance Scores | SC   | ST    | Storage Time |       |       |       |       |       |       |       |       |       |       |       |     |     |
|-------------------|------|-------|--------------|-------|-------|-------|-------|-------|-------|-------|-------|-------|-------|-------|-----|-----|
|                   |      |       | 1W           | 2W    | 1M    | 2M    | 3M    | 4M    | 5M    | 6M    | 7M    | 8M    | 9M    | 10M   | 11M | 12M |
|                   | 10 % | C     | a,A,1        | b,A,1 |       |       |       |       |       |       |       |       |       |       |     |     |
|                   |      | FM    | a,A,2        | b,A,2 | c,A   | d,A   |       |       |       |       |       |       |       |       |     |     |
|                   | 15 % | C     | a,B,1        | b,B,1 | c,A,1 | d,A,1 |       |       |       |       |       |       |       |       |     |     |
|                   |      | FM    | a,B,1        | b,B,2 | c,B,2 | d,B,2 | e,A   |       |       |       |       |       |       |       |     |     |
|                   | 20 % | C     | a,C,1        | a,C,1 | b,B,1 | c,B,1 | d,A,1 | e,A,1 | f,A   |       |       |       |       |       |     |     |
|                   |      | FM    | a,C,1        | b,C,1 | c,C,2 | d,C,1 | e,B,1 | f,A,2 |       |       |       |       |       |       |     |     |
|                   | 25 % | C     | a,D,1        | a,D,1 | b,C,1 | c,C,1 | d,B,1 | e,B,1 | f,B,1 | g,A   |       |       |       |       |     |     |
|                   |      | FM    | a,D,1        | b,C,1 | c,D,1 | d,D,1 | e,C,1 | f,B,1 | g,A,2 |       |       |       |       |       |     |     |
| 30 %              | C    | a,D,1 | a,D,1        | b,D,1 | c,D,1 | c,C,1 | d,C,1 | e,C,1 | f,B,1 | f,A,1 | g,A,1 | h,A,1 | i,A   |       |     |     |
|                   | FM   | a,E,1 | b,D,1        | c,E,2 | d,E,2 | e,D,2 | f,C,2 | g,B,2 | h,B,2 | i,B,2 | j,B,2 | k,A,2 |       |       |     |     |
| DS                | C    | a,D,1 | a,D,1        | a,D,1 | b,D,1 | c,C,1 | c,C,1 | d,C,1 | d,B,1 | e,A,1 | f,A,1 | g,A,1 | h,B,1 | i,1   |     |     |
|                   | FM   | a,E,1 | b,D,1        | b,F,1 | c,E,1 | c,E,1 | d,D,1 | e,C,1 | f,C,1 | g,C,1 | h,C,1 | i,B,2 | j,2   | k,1,2 | 1   |     |

| Odour Scores | SC | ST    | Storage Time |       |        |        |        |        |        |       |       |       |       |     |     |      |
|--------------|----|-------|--------------|-------|--------|--------|--------|--------|--------|-------|-------|-------|-------|-----|-----|------|
|              |    |       | 1W           | 2W    | 1M     | 2M     | 3M     | 4M     | 5M     | 6M    | 7M    | 8M    | 9M    | 10M | 11M | 12 M |
|              | 10 | C     | a,A,1        | b,A,1 |        |        |        |        |        |       |       |       |       |     |     |      |
|              | %  | FM    | a,A,2        | b,A,2 | c,A    | d,A    |        |        |        |       |       |       |       |     |     |      |
|              | 15 | C     | a,B,1        | b,B,1 | c,A,1  | d,A,1  |        |        |        |       |       |       |       |     |     |      |
|              | %  | FM    | a,B,1        | b,B,2 | c,B,2  | d,B,2  | e,A    |        |        |       |       |       |       |     |     |      |
|              | 20 | C     | a,C,1        | b,C,1 | c,B,1  | c,B,1  | d,A,1  | e,A,1  | f,A    |       |       |       |       |     |     |      |
|              | %  | FM    | a,C,1        | b,C,1 | c,C,1  | d,C,2  | d,B,2  | e,A,2  |        |       |       |       |       |     |     |      |
|              | 25 | C     | a,D,1        | a,D,1 | b,C,1  | c,C,1  | d,B,1  | e,B,1  | e,B,1  | f,A   |       |       |       |     |     |      |
|              | %  | FM    | a,D,1        | b,D,1 | c,D,1  | d,D,1  | e,C,1  | f,B,1  | g,A,2  |       |       |       |       |     |     |      |
| 30           | C  | a,D,1 | a,D,1        | b,D,1 | bc,D,1 | cd,C,1 | d,C,1  | de,C,1 | e,B,1  | e,A,1 | f,A,1 | g,A,1 | h,A   |     |     |      |
| %            | FM | a,E,2 | b,E,1        | c,E,1 | d,E,2  | e,D,2  | f,C,2  | g,B,1  | h,B,1  | i,B,1 | j,B,1 | k,A,2 |       |     |     |      |
| DS           | C  | a,D,1 | a,D,1        | b,D,1 | cd,D,1 | d,C,1  | de,C,1 | e,D,1  | ef,B,1 | f,A,1 | g,A,1 | h,A,1 | i,B,1 | j,1 |     |      |
|              | FM | a,F,2 | b,F,1        | c,F,1 | d,F,2  | e,E,2  | f,D,2  | g,C,2  | h,C,2  | i,C,1 | j,C,1 | k,B,1 | l,2   | m,2 | n   |      |

| Texture Scores | SC   | ST    | Storage Time |       |       |        |       |        |       |        |       |       |       |     |     |     |
|----------------|------|-------|--------------|-------|-------|--------|-------|--------|-------|--------|-------|-------|-------|-----|-----|-----|
|                |      |       | 1W           | 2W    | 1M    | 2M     | 3M    | 4M     | 5M    | 6M     | 7M    | 8M    | 9M    | 10M | 11M | 12M |
|                | 10 % | C     | a,A,1        | b,A,1 |       |        |       |        |       |        |       |       |       |     |     |     |
|                |      | FM    | a,A,2        | b,A,2 | c,A   | d,A    |       |        |       |        |       |       |       |     |     |     |
|                | 15 % | C     | a,B,1        | b,B,1 | c,A,1 | d,A,1  |       |        |       |        |       |       |       |     |     |     |
|                |      | FM    | a,A,1        | a,B,2 | b,B,2 | c,B,2  | d,A   |        |       |        |       |       |       |     |     |     |
|                | 20 % | C     | a,C,1        | b,C,1 | c,B,1 | d,B,1  | e,A,1 | f,A,1  | g,A   |        |       |       |       |     |     |     |
|                |      | FM    | a,B,1        | a,B,1 | b,C,1 | c,C,1  | d,B,2 | e,A,2  |       |        |       |       |       |     |     |     |
|                | 25 % | C     | a,C,1        | a,D,1 | b,C,1 | c,C,1  | d,B,1 | e,A,1  | f,B,1 | g,A    |       |       |       |     |     |     |
|                |      | FM    | a,A,1        | b,A,1 | c,D,1 | d,D,1  | e,C,1 | f,B,1  | g,A,2 |        |       |       |       |     |     |     |
| 30 %           | C    | a,C,1 | a,D,1        | b,D,1 | b,D,1 | bc,C,1 | c,B,1 | cd,C,1 | d,B,1 | de,A,1 | f,A,1 | g,A,1 | h,A   |     |     |     |
|                | FM   | a,B,2 | b,B,2        | c,B,1 | d,E,2 | e,D,2  | f,C,2 | g,B,1  | h,B,1 | i,B,1  | j,B,1 | k,A,2 |       |     |     |     |
| DS             | C    | a,C,1 | a,D,1        | b,D,1 | b,D,1 | c,C,1  | c,B,1 | d,C,1  | e,B,1 | f,A,1  | g,A,1 | g,A,1 | h,B,1 | i,1 |     |     |
|                | FM   | a,C,2 | b,B,1        | c,E,1 | d,F,2 | e,E,2  | f,D,2 | g,C,2  | h,C,1 | i,C,1  | j,C,1 | k,B,2 | l,1   | m,2 | n   |     |

| Overall Sensory Results | SC   | ST    | Storage Time |       |       |       |       |       |       |       |       |       |       |     |     |     |
|-------------------------|------|-------|--------------|-------|-------|-------|-------|-------|-------|-------|-------|-------|-------|-----|-----|-----|
|                         |      |       | 1W           | 2W    | 1M    | 2M    | 3M    | 4M    | 5M    | 6M    | 7M    | 8M    | 9M    | 10M | 11M | 12M |
|                         | 10 % | C     | a,A,1        | b,A,1 |       |       |       |       |       |       |       |       |       |     |     |     |
|                         |      | FM    | a,A,2        | b,A,2 | c,A   | d,A   |       |       |       |       |       |       |       |     |     |     |
|                         | 15 % | C     | a,B,1        | b,B,1 | c,A,1 | d,A,1 |       |       |       |       |       |       |       |     |     |     |
|                         |      | FM    | a,A,2        | b,B,2 | c,B,2 | d,B,2 |       |       |       |       |       |       |       |     |     |     |
|                         | 20 % | C     | a,C,1        | b,C,1 | c,B,1 | d,B,1 | e,A,1 | f,A,1 | g,A   |       |       |       |       |     |     |     |
|                         |      | FM    | a,B,2        | b,C,2 | c,C,2 | d,C,2 | e,A,2 | f,A,2 |       |       |       |       |       |     |     |     |
|                         | 25 % | C     | a,D,1        | a,D,1 | b,C,1 | c,C,1 | d,B,1 | e,B,1 | f,B,1 | g,A   |       |       |       |     |     |     |
|                         |      | FM    | a,B,2        | b,D,1 | c,D,1 | d,D,2 | e,B,2 | f,B,2 | g,A,2 |       |       |       |       |     |     |     |
| 30 %                    | C    | a,D,1 | b,D,1        | c,D,1 | d,D,1 | e,C,1 | f,C,1 | g,C,1 | h,B,1 | i,A,1 | j,A,1 | k,A,1 | l,A   |     |     |     |
|                         | FM   | a,B,2 | b,D,2        | c,D,2 | d,D,2 | e,C,2 | f,C,2 | g,B,2 | h,B,2 | i,B,2 | j,B,1 | k,A,2 |       |     |     |     |
| DS                      | C    | a,D,1 | b,D,1        | c,D,1 | d,D,1 | e,C,1 | f,C,1 | g,D,1 | h,C,1 | i,A,1 | j,A,1 | k,B,1 | l,B,1 | 1   |     |     |
|                         | FM   | a,B,2 | a,D,1        | b,D,1 | c,D,1 | d,C,1 | e,D,2 | f,C,1 | g,C,1 | h,C,1 | i,C,2 | j,B,2 | k,2   | l,2 | m   |     |

| TVB-N (g/100g) | SC | ST | Storage Time |       |       |       |       |       |     |    |    |    |    |     |     |     |
|----------------|----|----|--------------|-------|-------|-------|-------|-------|-----|----|----|----|----|-----|-----|-----|
|                |    |    | 1W           | 2W    | 1M    | 2M    | 3M    | 4M    | 5M  | 6M | 7M | 8M | 9M | 10M | 11M | 12M |
|                | 10 | C  | a,A,1        | b,A,1 |       |       |       |       |     |    |    |    |    |     |     |     |
|                | %  | FM | a,A,2        | b,A,2 | c,A   | d,A   |       |       |     |    |    |    |    |     |     |     |
|                | 15 | C  | a,B,1        | b,B,1 | c,A,1 | d,A,1 |       |       |     |    |    |    |    |     |     |     |
|                | %  | FM | a,B,2        | b,B,2 | c,B,2 | d,B,2 | e,A   |       |     |    |    |    |    |     |     |     |
|                | 20 | C  | a,C,1        | b,C,1 | c,B,1 | d,B,1 | e,A,1 | f,A,1 | g,A |    |    |    |    |     |     |     |
|                |    |    |              |       |       |       |       |       |     |    |    |    |    |     |     |     |
|                |    |    |              |       |       |       |       |       |     |    |    |    |    |     |     |     |
|                |    |    |              |       |       |       |       |       |     |    |    |    |    |     |     |     |

|  |    |    |       |       |       |       |       |       |       |       |       |       |       |       |     |   |
|--|----|----|-------|-------|-------|-------|-------|-------|-------|-------|-------|-------|-------|-------|-----|---|
|  | %  | FM | a,C,2 | b,C,2 | c,C,2 | d,C,1 | e,B,2 | f,A,2 |       |       |       |       |       |       |     |   |
|  | 25 | C  | a,D,1 | b,D,1 | c,C,1 | d,C,1 | e,B,1 | f,B,1 | g,B,1 | h,A,1 |       |       |       |       |     |   |
|  | %  | FM | a,D,2 | b,C,2 | c,D,2 | d,D,2 | e,C,2 | f,B,2 | g,A,2 | h,A,2 | i,A   | j,A   |       |       |     |   |
|  | 30 | C  | a,E,1 | b,E,1 | c,D,1 | d,D,1 | e,C,1 | f,C,1 | g,C,1 | h,B,1 | i,A,1 | j,A,1 | k,A,1 | l,A   |     |   |
|  | %  | FM | a,E,2 | b,D,2 | c,E,2 | d,E,2 | e,D,2 | f,C,2 | g,B,2 | h,B,2 | i,B,2 | j,B,2 | k,A,2 |       |     |   |
|  | DS | C  | a,E,1 | b,E,1 | c,D,1 | d,E,1 | e,D,1 | f,D,1 | g,D,1 | h,C,1 | i,B,1 | j,B,1 | k,B,1 | l,B,1 | m,1 |   |
|  |    | FM | a,E,2 | b,D,2 | b,F,2 | c,E,2 | c,E,2 | d,D,2 | e,C,2 | f,C,2 | g,C,2 | h,C,2 | i,B,2 | j,2   | k,1 | l |

| TBA (mg MA/kg) | SC | ST | Storage Time |       |       |       |       |       |       |       |       |       |       |     |     |      |
|----------------|----|----|--------------|-------|-------|-------|-------|-------|-------|-------|-------|-------|-------|-----|-----|------|
|                |    |    | 1W           | 2W    | 1M    | 2M    | 3M    | 4M    | 5M    | 6M    | 7M    | 8M    | 9M    | 10M | 11M | 12 M |
|                | 10 | C  | a,A,1        | a,A,1 |       |       |       |       |       |       |       |       |       |     |     |      |
|                | %  | FM | a,A,2        | b,A,2 | c,A   | d,A   |       |       |       |       |       |       |       |     |     |      |
|                | 15 | C  | a,B,1        | b,B,1 | c,A,1 | d,A,1 |       |       |       |       |       |       |       |     |     |      |
|                | %  | FM | a,B,1        | b,B,1 | c,B,1 | d,B,1 | e,A   |       |       |       |       |       |       |     |     |      |
|                | 20 | C  | a,C,1        | b,C,1 | c,B,1 | d,B,1 | e,A,1 | f,A,1 | g,A   |       |       |       |       |     |     |      |
|                | %  | FM | a,C,2        | b,C,1 | c,C,1 | d,C,2 | d,B,2 | e,A,2 |       |       |       |       |       |     |     |      |
|                | 25 | C  | a,D,1        | b,D,1 | c,C,1 | d,C,1 | e,B,1 | f,B,1 | g,B,1 | h,A,1 |       |       |       |     |     |      |
|                | %  | FM | a,D,2        | b,D,2 | c,D,2 | d,D,2 | e,C,2 | f,B,2 | g,A,2 | h,A,2 | i,A   | j,A   |       |     |     |      |
|                | 30 | C  | a,E,1        | b,E,1 | c,D,1 | d,D,1 | e,C,1 | f,C,1 | g,C,1 | h,B,1 | i,A,1 | j,A,1 | k,A,1 |     |     |      |
|                | %  | FM | a,E,1        | b,E,2 | c,E,1 | d,E,1 | e,D,1 | f,C,1 | g,B,1 | h,B,2 | i,B,2 | j,B,2 | k,A,2 |     |     |      |
|                | DS | C  | a,F,1        | b,F,1 | c,E,1 | d,E,1 | e,D,1 | f,D,1 | g,C,1 | h,C,1 | i,B,1 | j,B,1 | k,B,1 | l,1 | m,1 |      |
|                |    | FM | a,F,1        | b,F,2 | c,F,1 | d,F,1 | e,E,2 | f,D,2 | g,C,2 | h,C,1 | i,C,1 | j,C,1 | k,B,1 | l,1 | m,2 | n    |

| TMA (g/100g) | SC | ST | Storage Time |       |       |       |       |       |       |       |       |       |       |       |     |     |
|--------------|----|----|--------------|-------|-------|-------|-------|-------|-------|-------|-------|-------|-------|-------|-----|-----|
|              |    |    | 1W           | 2W    | 1M    | 2M    | 3M    | 4M    | 5M    | 6M    | 7M    | 8M    | 9M    | 10M   | 11M | 12M |
|              | 10 | C  | a,A,1        | b,A,1 |       |       |       |       |       |       |       |       |       |       |     |     |
|              | %  | FM | a,A,2        | b,A,2 | c,A   | d,A   |       |       |       |       |       |       |       |       |     |     |
|              | 15 | C  | a,B,1        | b,B,1 | c,A,1 | d,A,1 |       |       |       |       |       |       |       |       |     |     |
|              | %  | FM | a,A,2        | a,B,2 | b,B,2 | c,B,2 | d,A   |       |       |       |       |       |       |       |     |     |
|              | 20 | C  | a,C,1        | b,C,1 | c,B,1 | d,B,1 | e,A,1 | f,A,1 | g,A   |       |       |       |       |       |     |     |
|              | %  | FM | a,B,2        | a,B,2 | b,C,2 | c,C,2 | d,B,2 | e,A,2 |       |       |       |       |       |       |     |     |
|              | 25 | C  | a,D,1        | b,D,1 | c,C,1 | d,C,1 | e,B,1 | f,B,1 | g,B,1 | h,A,1 |       |       |       |       |     |     |
|              | %  | FM | a,A,2        | b,A,2 | c,D,2 | d,D,2 | e,C,1 | f,B,2 | g,A,2 | h,A,2 | i,A   | j,A   |       |       |     |     |
|              | 30 | C  | a,E,1        | b,E,1 | c,D,1 | d,D,1 | e,C,1 | e,C,1 | f,C,1 | g,B,1 | h,A,1 | i,A,1 | j,A,1 | k,A   |     |     |
|              | %  | FM | a,B,2        | b,B,2 | c,B,2 | d,E,2 | e,D,2 | f,C,2 | g,B,2 | h,B,2 | i,B,2 | j,B,2 | k,A,2 |       |     |     |
|              | DS | C  | a,F,1        | b,F,1 | c,E,1 | d,E,1 | e,D,1 | f,D,1 | g,D,1 | h,C,1 | i,B,1 | j,B,1 | k,B,1 | l,B,1 |     |     |
|              |    | FM | a,C,2        | b,B,2 | c,E,2 | d,F,2 | e,E,2 | f,D,2 | g,C,2 | h,C,2 | i,C,2 | j,C,2 | k,B,2 | l,2   | m   | n   |

| Moisture (%) | SC | ST | Storage Time |       |       |       |       |       |       |       |       |       |       |       |     |     |
|--------------|----|----|--------------|-------|-------|-------|-------|-------|-------|-------|-------|-------|-------|-------|-----|-----|
|              |    |    | 1W           | 2W    | 1M    | 2M    | 3M    | 4M    | 5M    | 6M    | 7M    | 8M    | 9M    | 10M   | 11M | 12M |
|              | 10 | C  | a,A,1        | b,A,1 |       |       |       |       |       |       |       |       |       |       |     |     |
|              | %  | FM | a,A,2        | a,A,2 | a,A   | a,A   |       |       |       |       |       |       |       |       |     |     |
|              | 15 | C  | a,B,1        | b,B,1 | c,A,1 | c,A,1 |       |       |       |       |       |       |       |       |     |     |
|              | %  | FM | a,B,2        | a,B,2 | b,B,2 | b,B,2 | c,A   |       |       |       |       |       |       |       |     |     |
|              | 20 | C  | a,C,1        | b,C,1 | c,B,1 | c,B,1 | c,A,1 | c,A,1 | c,A   |       |       |       |       |       |     |     |
|              | %  | FM | a,B,2        | a,B,2 | a,C,2 | a,C,2 | a,B,2 | a,A,2 |       |       |       |       |       |       |     |     |
|              | 25 | C  | a,D,1        | b,D,1 | c,C,1 | c,C,1 | d,B,1 | d,B,1 | d,B,1 | d,A,1 |       |       |       |       |     |     |
|              | %  | FM | a,C,2        | a,C,2 | a,D,2 | a,D,2 | a,C,2 | a,B,2 | a,A,2 | a,A,2 | b,A   | b,A   |       |       |     |     |
|              | 30 | C  | a,E,1        | b,E,1 | c,D,1 | c,D,1 | c,C,1 | c,C,1 | c,C,1 | c,B,1 | c,A,1 | c,A,1 | c,A,1 | c,A   |     |     |
|              | %  | FM | a,D,2        | b,C,2 | b,D,2 | b,D,2 | b,C,2 | b,B,2 | b,B,2 | b,B,2 | b,A,1 | a,A,1 | a,A,2 |       |     |     |
|              | DS | C  | a,F,1        | b,F,1 | c,E,1 | d,E,1 | c,D,1 | c,D,1 | c,D,1 | c,C,1 | c,B,1 | c,B,1 | c,B,1 | c,B,1 | c,1 |     |
|              |    | FM | a,C,2        | a,D,2 | a,D,2 | a,D,2 | a,C,2 | a,C,1 | a,C,2 | a,C,2 | a,B,1 | a,B,1 | a,B,1 | a,2   | a,2 | a   |

| pH | SC | ST | Storage Time |       |       |       |       |       |       |       |       |       |       |       |     |     |
|----|----|----|--------------|-------|-------|-------|-------|-------|-------|-------|-------|-------|-------|-------|-----|-----|
|    |    |    | 1W           | 2W    | 1M    | 2M    | 3M    | 4M    | 5M    | 6M    | 7M    | 8M    | 9M    | 10M   | 11M | 12M |
|    | 10 | C  | a,A,1        | b,A,1 |       |       |       |       |       |       |       |       |       |       |     |     |
|    | %  | FM | a,A,2        | b,A,2 | c,A   | d,A   |       |       |       |       |       |       |       |       |     |     |
|    | 15 | C  | a,B,1        | b,B,1 | c,A,1 | d,A,1 |       |       |       |       |       |       |       |       |     |     |
|    | %  | FM | a,B,2        | a,B,2 | b,B,2 | c,B,2 | d,A   |       |       |       |       |       |       |       |     |     |
|    | 20 | C  | a,B,1        | b,C,1 | a,B,1 | c,B,1 | d,A,1 | e,A,1 | f,A   |       |       |       |       |       |     |     |
|    | %  | FM | a,C,2        | b,C,2 | a,C,2 | c,C,2 | d,B,2 | e,A,2 |       |       |       |       |       |       |     |     |
|    | 25 | C  | a,C,1        | a,D,1 | a,C,1 | b,C,1 | c,B,1 | d,B,1 | e,B,1 | f,A,1 |       |       |       |       |     |     |
|    | %  | FM | a,D,2        | b,D,2 | c,D,2 | d,D,2 | e,C,2 | f,B,2 | g,A,2 | h,A,2 | i,A   | j,A   |       |       |     |     |
|    | 30 | C  | a,D,1        | b,E,1 | b,C,1 | a,D,1 | a,C,1 | c,C,1 | c,C,1 | c,B,1 | d,A,1 | e,A,1 | e,A,1 | f,A   |     |     |
|    | %  | FM | a,E,2        | b,E,2 | b,E,2 | c,E,2 | a,D,2 | d,C,2 | e,B,2 | f,B,2 | g,B,2 | h,B,2 | i,A,2 |       |     |     |
|    | DS | C  | a,D,1        | a,F,1 | a,D,1 | a,E,1 | a,C,1 | b,D,1 | b,D,1 | c,C,1 | a,B,1 | b,B,1 | c,B,1 | c,B,1 | c,1 |     |
|    |    | FM | a,F,2        | b,D,2 | a,F,2 | c,F,2 | d,E,2 | d,C,2 | e,B,2 | e,C,2 | f,C,2 | g,C,2 | h,B,2 | h,2   | f,2 | f   |

| a <sub>w</sub> | SC   | ST | Storage Time |       |       |       |       |       |       |       |       |       |       |       |     |     |
|----------------|------|----|--------------|-------|-------|-------|-------|-------|-------|-------|-------|-------|-------|-------|-----|-----|
|                |      |    | 1W           | 2W    | 1M    | 2M    | 3M    | 4M    | 5M    | 6M    | 7M    | 8M    | 9M    | 10M   | 11M | 12M |
|                | 10 % | C  | a,A,1        | b,A,1 |       |       |       |       |       |       |       |       |       |       |     |     |
|                |      | FM | a,A,2        | b,A,2 | a,A   | a,A   |       |       |       |       |       |       |       |       |     |     |
|                | 15 % | C  | a,B,1        | b,B,1 | c,A,1 | d,A,1 |       |       |       |       |       |       |       |       |     |     |
|                |      | FM | a,A,2        | a,B,2 | a,B,2 | a,B,2 | a,A   |       |       |       |       |       |       |       |     |     |
|                | 20 % | C  | a,C,1        | b,C,1 | c,B,1 | d,B,1 | e,A,1 | e,A,1 | e,A   |       |       |       |       |       |     |     |
|                |      | FM | a,C,2        | b,C,2 | b,C,2 | c,C,2 | c,B,2 | c,A,2 |       |       |       |       |       |       |     |     |
|                | 25 % | C  | a,D,1        | b,D,1 | c,C,1 | d,C,1 | e,B,1 | f,B,1 | f,B,1 | e,A,1 |       |       |       |       |     |     |
|                |      | FM | a,D,2        | a,D,2 | a,D,2 | a,D,2 | a,C,1 | a,B,2 | a,A,1 | a,A,2 | a,A   | b,A   |       |       |     |     |
|                | 30 % | C  | a,E,1        | b,E,1 | c,D,1 | c,D,1 | c,C,1 | d,C,1 | c,C,1 | c,B,1 | d,A,1 | c,A,1 | c,A,1 | c,A   |     |     |
|                |      | FM | a,E,2        | a,D,2 | b,E,2 | b,E,2 | b,D,2 | a,C,2 | b,B,2 | b,B,2 | a,B,2 | c,B,2 | d,A,2 |       |     |     |
|                | DS   | C  | a,F,1        | b,F,1 | c,E,1 | c,E,1 | c,D,1 | c,D,1 | c,D,1 | c,C,1 | c,B,1 | c,B,1 | c,B,1 | c,B,1 | c,1 |     |
|                |      | FM | a,F,2        | b,E,2 | c,F,2 | c,F,2 | c,E,2 | c,D,2 | c,C,2 | c,C,2 | c,C,2 | c,C,2 | c,C,2 | c,B,2 | c,2 | d,2 |

| Salt (%) | SC   | ST | Storage Time |       |       |       |       |       |       |       |       |       |       |       |     |     |
|----------|------|----|--------------|-------|-------|-------|-------|-------|-------|-------|-------|-------|-------|-------|-----|-----|
|          |      |    | 1W           | 2W    | 1M    | 2M    | 3M    | 4M    | 5M    | 6M    | 7M    | 8M    | 9M    | 10M   | 11M | 12M |
|          | 10 % | C  | a,A,1        | b,A,1 |       |       |       |       |       |       |       |       |       |       |     |     |
|          |      | FM | a,A,2        | b,A,2 | b,A   | c,A   |       |       |       |       |       |       |       |       |     |     |
|          | 15 % | C  | a,B,1        | b,B,1 | c,A,1 | d,A,1 |       |       |       |       |       |       |       |       |     |     |
|          |      | FM | a,B,2        | b,B,2 | b,B,1 | c,B,2 | c,A   |       |       |       |       |       |       |       |     |     |
|          | 20 % | C  | a,C,1        | b,B,1 | c,B,1 | d,B,1 | e,A,1 | d,A,1 | e,A   |       |       |       |       |       |     |     |
|          |      | FM | a,C,2        | b,C,1 | b,C,2 | b,C,2 | b,B,2 | b,A,2 |       |       |       |       |       |       |     |     |
|          | 25 % | C  | a,D,1        | b,C,1 | c,C,1 | c,C,1 | d,B,1 | e,B,1 | e,B,1 | e,A,1 |       |       |       |       |     |     |
|          |      | FM | a,D,2        | a,D,2 | a,D,1 | a,D,1 | a,C,2 | b,B,2 | b,A,1 | a,A,2 | b,A   | b,A   |       |       |     |     |
|          | 30 % | C  | a,E,1        | b,D,1 | c,D,1 | c,D,1 | c,C,1 | c,C,1 | c,C,1 | c,B,1 | c,A,1 | c,A,1 | c,A,1 | c,A   |     |     |
|          |      | FM | a,E,2        | b,E,2 | c,D,2 | c,D,2 | c,C,2 | c,B,2 | c,A,2 | c,A,2 | d,B,2 | e,A,1 | f,A,1 |       |     |     |
|          | DS   | C  | a,F,1        | b,E,1 | c,E,1 | d,E,1 | c,D,1 | c,D,1 | c,D,1 | c,C,1 | c,B,1 | c,B,1 | c,B,1 | c,B,1 | c,1 |     |
|          |      | FM | a,F,2        | b,F,2 | b,E,2 | b,E,2 | b,D,2 | b,C,2 | b,B,2 | b,B,2 | b,C,2 | b,B,2 | b,B,2 | b,B,2 | b,2 | b,2 |

| WPS (%) | SC | ST    | Storage Time |       |       |       |       |       |       |       |       |       |       |     |     |     |
|---------|----|-------|--------------|-------|-------|-------|-------|-------|-------|-------|-------|-------|-------|-----|-----|-----|
|         |    |       | 1W           | 2W    | 1M    | 2M    | 3M    | 4M    | 5M    | 6M    | 7M    | 8M    | 9M    | 10M | 11M | 12M |
|         | 10 | C     | a,A,1        | b,A,1 |       |       |       |       |       |       |       |       |       |     |     |     |
|         | %  | FM    | a,A,2        | a,A,2 | a,A   | b,A   |       |       |       |       |       |       |       |     |     |     |
|         | 15 | C     | a,B,1        | b,B,1 | c,A,1 | d,A,1 |       |       |       |       |       |       |       |     |     |     |
|         | %  | FM    | a,B,2        | b,B,2 | c,B,1 | b,B,1 | c,A   |       |       |       |       |       |       |     |     |     |
|         | 20 | C     | a,C,1        | b,C,1 | c,B,2 | d,B,2 | e,A,1 | e,A,1 | e,A   |       |       |       |       |     |     |     |
|         | %  | FM    | a,C,2        | b,C,2 | c,C,1 | d,C,2 | b,B,2 | d,A,2 |       |       |       |       |       |     |     |     |
|         | 25 | C     | a,D,1        | b,D,1 | c,C,1 | c,C,1 | c,B,1 | d,B,1 | c,B,1 | c,A,1 |       |       |       |     |     |     |
|         | %  | FM    | a,D,2        | b,D,2 | c,D,2 | c,D,2 | c,C,2 | c,B,2 | b,A,2 | b,A,2 | b,A   | d,A   |       |     |     |     |
| 30      | C  | a,E,1 | b,E,1        | c,D,1 | c,D,1 | c,C,1 | d,C,1 | d,C,1 | d,B,1 | d,A,1 | d,A,1 | d,A,1 | d,A   |     |     |     |
| %       | FM | a,E,2 | b,E,2        | c,E,1 | d,E,1 | e,C,2 | e,B,1 | e,B,2 | e,B,1 | d,A,1 | d,B,1 | b,A,2 |       |     |     |     |
| DS      | C  | a,F,1 | b,F,1        | c,E,1 | d,E,1 | c,D,1 | d,D,1 | d,D,1 | c,C,1 | c,B,1 | d,B,1 | c,B,1 | c,B,1 | c,1 |     |     |
|         | FM | a,F,2 | b,F,2        | c,F,1 | d,F,2 | d,D,1 | e,C,2 | f,C,2 | g,C,2 | h,B,2 | h,C,2 | i,B,2 | j,1,2 | k,2 | l   |     |

The different lowercase letters (a.b.c., etc) within the same column represent statistical differences depending on time within the same brine concentration and dry salting method for each group (control and experimental group)  $p < 0.05$ . The different uppercase letters (A,B,C., etc) within the same column represent statistical differences amongst the different brine concentrations within the same brine concentration and dry salting method for each group (control and experimental) ( $p < 0.05$ ). The different superscript numbers (1,2) in front of data within the same column represent statistical differences between control and experimental groups for the same brine concentration and dry salting method for the same storage time ( $p < 0.05$ ). M: month, W: week, DS: Dry salted, C: Control group, FM: experimental group (raw materials previously frozen and thawed). SC: Salt Concentration, ST: Sample type
